# Supplementary material for: Discovery and Evolution of New Domains in Yeast Heterochromatin Factor Sir4 and Its Partner Esc1
Source: PubMed Central journal article supplement (PMC6394760; doi:10.1093/gbe/evz010), 2019-01-22
Supplement: evz010_supp.pdf [file evz010_supp.pdf]

**Discovery and Evolution of New Domains  
in Yeast Heterochromatin Factor Sir4 and its Partner Esc1**

**SUPPLEMENTARY DATA**

Guilhem Faure \*1,3, Kévin Jézéquel \*2, Florian Roisé-Hamelin \*2, Tristan Bitard-Feildel  
1,4, Alexis Lamiable 1, Stéphane Marcand #2 and Isabelle Callebaut #1

1. Sorbonne Université, Muséum National d'Histoire Naturelle, UMR CNRS 7590, IRD, Institut de Minéralogie, de Physique des Matériaux et de Cosmochimie, IMPMC, 75005 Paris, France

2. Institut de Biologie François Jacob, IRCM/SIGRR/LTR, INSERM UMR 967, CEA Paris-Saclay, France

3. *Present address:* National Center for Biotechnology Information, National Library of Medicine, National Institutes of Health, Bethesda, MD 20894, USA

4. *Present address:* Sorbonne Université, UMR CNRS 7238, IBPS, Laboratoire de Biologie Computationnelle et Quantitative (LCQB), 75005 Paris, France

\* Equal contributions

# Equal contributions and corresponding authors:

[isabelle.callebaut@upmc.fr](mailto:isabelle.callebaut@upmc.fr)

[stephane.marcand@cea.fr](mailto:stephane.marcand@cea.fr)

|                                                                                   |                                    | I (UniProt / gene)     | II (UniProt / gene)      | Dbf4 (UniProt)       | Itc1 (UniProt)       | Esc1 (UniProt) |
|-----------------------------------------------------------------------------------|------------------------------------|------------------------|--------------------------|----------------------|----------------------|----------------|
| S<br>A<br>C<br>H<br>A<br>R<br>O<br>M<br>Y<br>C<br>E<br>T<br>A<br>C<br>E<br>A<br>E | <i>Saccharomyces cerevisiae</i>    | <b>P11978 / SIR4</b>   | <b>P32448 / ASF2</b>     | P32325               | P53125               | Q03661         |
|                                                                                   | <i>Candida glabrata</i>            | Q6FM33 / SIR4          | -                        | Q6FV57               | Q6FRF3               | Q6FUF1         |
|                                                                                   | <i>Kazachstania naganishii</i>     | J7S2D5 / KNAG0A04340   | J7REX1 / KNAG0A04320     | J7S2Y3, J7S8G4       | J7S8C9               | J7SAL8         |
|                                                                                   | <i>Kazachstania africana</i>       | H2AVL7 / KAFR0E02650   | H2AZ26 / KAFR0E01720     | H2AYY2, H2ARM9       | H2B1U3               | H2AQH5         |
|                                                                                   | <i>Naumovozyma dairenensis</i>     | G0W8P4 / NDAI0C04960   | G0W8P5 (A) / NDAI0C04970 | G0W4H1(A), G0W521(B) | G0WFU3(A), G0WCG0(B) | G0WHN1         |
|                                                                                   | <i>Naumovozyma castellii</i>       | G0VBN1 / NCAS0B02730   | G0VBN0 (A) / NCAS0B02720 | G0V836(A), G0VJY1(B) | G0V5C3(A), G0VEJ8(B) | G0VC82         |
|                                                                                   | <i>Tetrapisispora phaffii</i>      | G8BRI2 / TPHA0C02030   | -                        | G8C0I6               | G8BYX7               | G8BVP5         |
|                                                                                   | <i>Vanderwaltozyma polyspora</i>   | A7TT32 / Kpol_269p1    | A7TT33 / Kpol_269p1      | A7TL67               | A7TE72               | A7TRH4         |
|                                                                                   | <i>Tetrapisispora blattae</i>      | I2H7J6 / TBLA0H0050    | -                        | I2H9I3, I2H7B0       | I2GV58               | I2GYI5         |
|                                                                                   | <i>Zygosacharomyces rouxii</i>     | C5DQ98 / ZYRO0A09790g  | C5DQ99 / ZYRO0A09812g    | C5E0G9               | C5E4M3               | C5DPU1         |
|                                                                                   | <i>Torulospora delbruckii</i>      | G8ZNX9 / TDEL0B01940   | G8ZNX8 / TDEL0B01930     | G8ZTG8               | G8ZVZ1               | G8ZPF8         |
|                                                                                   | <i>Kluyveromyces lactis</i>        | Q6CK56 / KLLA0_F13398g | Q6CK55 / KLLA0_F13420g   | Q6CKD0               | Q6CWR5               | Q6CU74         |
|                                                                                   | <i>Eremothecium gossypii</i>       | Q74ZW1 / AGOS_AGR188W  | Q74ZW0 / AGOS_AGR189W    | Q750Z2               | Q755D5               | Q756B4         |
|                                                                                   | <i>Eremothecium cymbalariae</i>    | G8JT52 / Ecym_4126     | G8JT51 / Ecym_4125       | G8JNV6               | G8JP27               | G8JVE7         |
|                                                                                   | <i>Lachancea waltii</i>            | Kwal_27.11611          | -                        | Kwal_27.10452        | Kwal_56.24134        | Kwal_26.9080   |
|                                                                                   | <i>Lachancea kluyverii</i>         | SAKL0H12606g           | -                        | SAKL0D02574g         | SAKL0A04004g         | SAKL0H05104g   |
| <i>Lachancea thermotolerans</i>                                                   | C5DI75 / KLTH0E10296g              | -                      | C5DDY7                   | C5E2C1               | C5DF68               |                |
| M<br>E<br>T<br>H<br>Y<br>L<br>O<br>T<br>R<br>O<br>P<br>H<br>S                     | <i>Pachysolen tannophilus</i>      | -                      | -                        | A0A1E4TQA9           | A0A1E4TZW6           |                |
|                                                                                   | <i>Komagataella pastoris</i> *     | -                      | -                        | A0A1B2J8P9           | A0A1B2JHS7           |                |
|                                                                                   | <i>Komagataella phaffii</i> *      | -                      | -                        | C4QV30               | F2QTP2               |                |
|                                                                                   | <i>Kuraishia capsulata</i>         | -                      | -                        | W6MM48               | W6MQ02               | -              |
|                                                                                   | <i>Candida arabinof fermentans</i> |                        |                          | A0A1E4T408           | A0A1E4SUV7           |                |
|                                                                                   | <i>Ogataea polymorpha</i>          | -                      | -                        | A0A1B7SCH7           | A0A1B7SLG9           | -              |
|                                                                                   | <i>Ogataea parapolyomorpha</i> **  | -                      | -                        | W1QIK4               | W1QA82               | -              |
|                                                                                   | <i>Dekkera bruxellensis</i> ***    | -                      | -                        | I2K3X6               | I2K0S1               | -              |
|                                                                                   | <i>Pichia membranifaciens</i>      | -                      | -                        | A0A1E3NMD2           | A0A1E3NF40           | -              |
| <i>Pichia kudriavzevii</i>                                                        | -                                  | -                      | A0A099NWV2               | A0A1V2LRF5           | -                    |                |

\* formerly called *Pichia pastoris*, \*\* formerly called *Hansenula parapolyomorpha*, \*\*\* formerly called *Brettanomyces bruxellensis*

**Supplementary Table S1:** UniProt accession of the protein sequences reported in this study, except for those of *Lachancea waltii* and *Lachancea kluyverii*, which were directly extracted from genome data. The corresponding gene names (italics) were also given for groups I and II, which were defined according to the synteny described in YGOB and to the similarity relationships identified here (see text). A and B stand for the track considered, according to YGOB ([http:// http://ygob.ucd.ie/](http://http://ygob.ucd.ie/)).

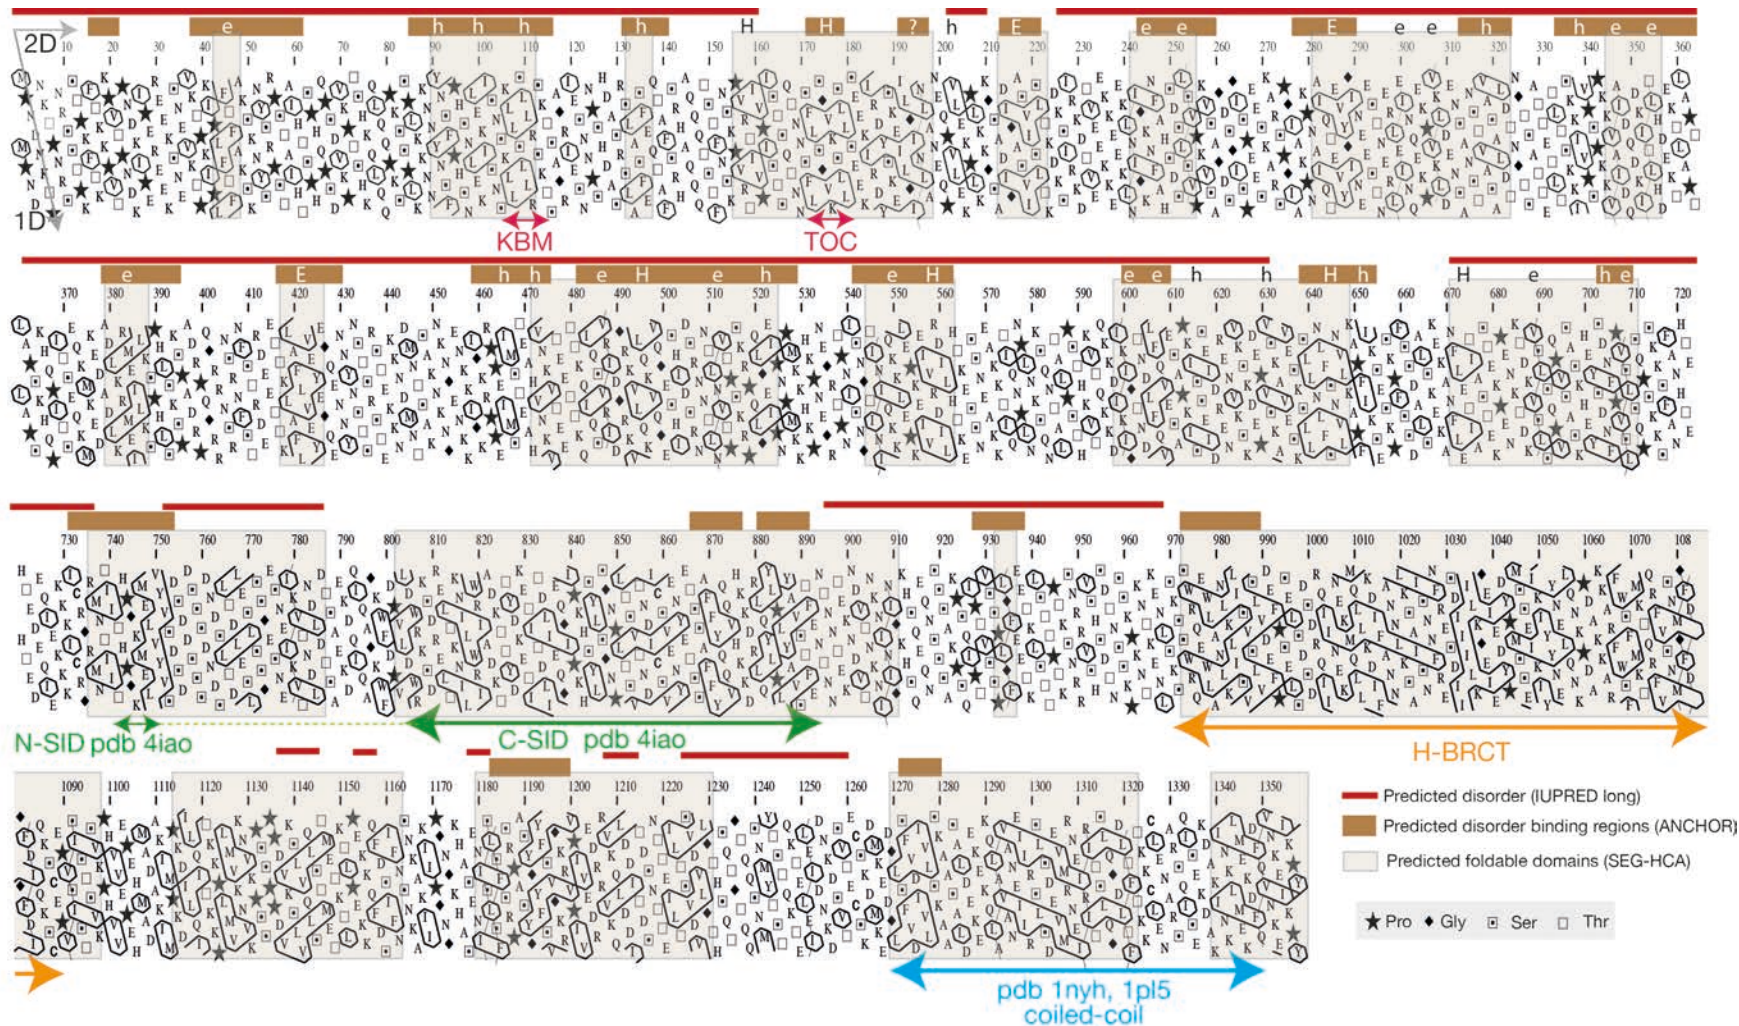

### Supplementary Figure S1:

**HCA plot of the *S. cerevisiae* Sir4 sequence.** Briefly, the sequence is shown on a duplicated alpha helical net, on which the strong hydrophobic amino acids (V, I, L, M, F, Y, W) are contoured. These form clusters, which have been shown to mainly correspond to regular secondary structures (Gaboriaud et al. 1987; Callebaut et al. 1997). The way to read the sequence (1D) and the secondary structures (2D) are indicated with arrows. Special symbols are used for four amino acids (P,G,S,T), according to their particular structural behavior. Predictions made by the disorder predictor IUPRED are reported (Dosztányi et al. 2005a; Dosztányi et al. 2005b), as well as those from the associated ANCHOR program (binding regions within disordered segments) (Dosztányi et al. 2009; Mészáros et al. 2009). The predictions of foldable domains (described as regions with high density in hydrophobic clusters), as made by SEG-HCA (Faure and Callebaut 2013), are boxed and shaded grey on the HCA plot. Finally, the positions of known 3D structures are also reported on the HCA plot, as well as the position of the H-BRCT domain delineated here. The secondary structure affinities of hydrophobic clusters included in the N-terminal region are reported up to the plot (H/h: strong and weak affinity for the  $\alpha$ -helical state, E/e: strong and weak affinity for the  $\beta$ -strand state), These were deduced from experimental databases (HCDB v2), updated from (Eudes et al. 2007).

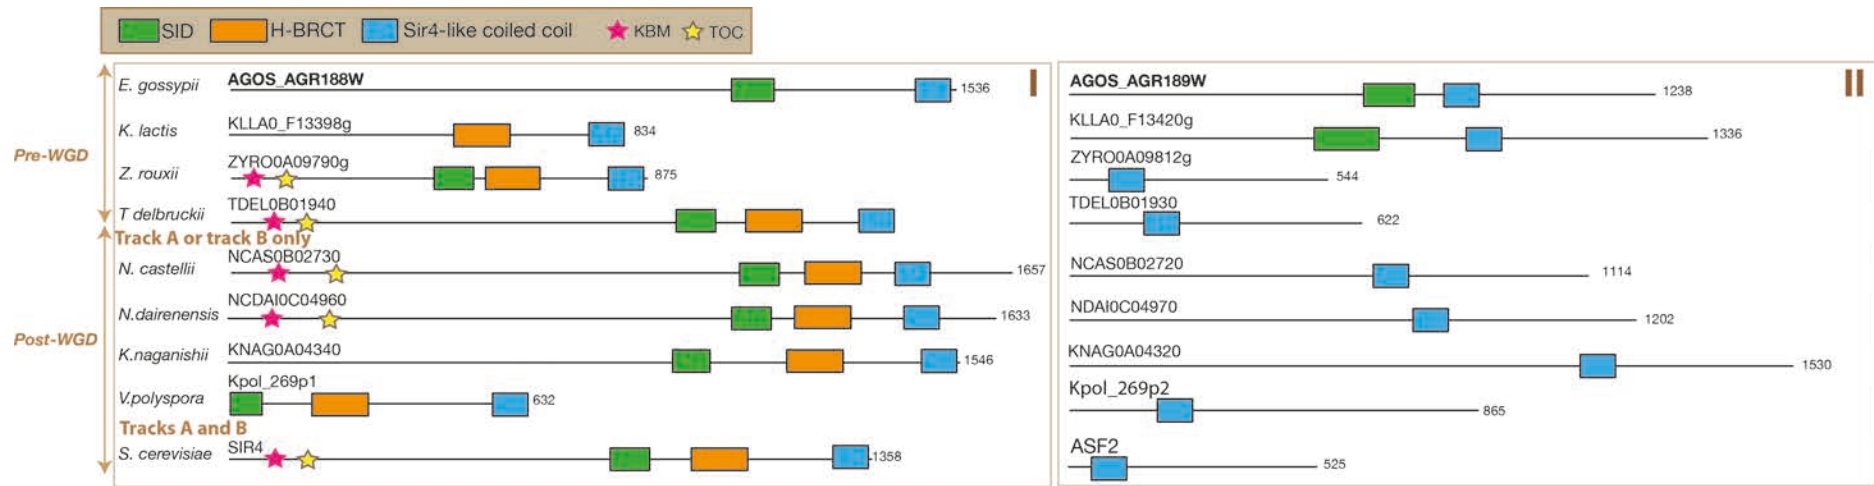

**Supplementary Figure S2:**  
**Architecture of proteins whose corresponding genes are contiguous in the same track (according to YGDB), compared to the *S. cerevisiae* SIR4 (group I) and ASF2 (group II) architectures.**

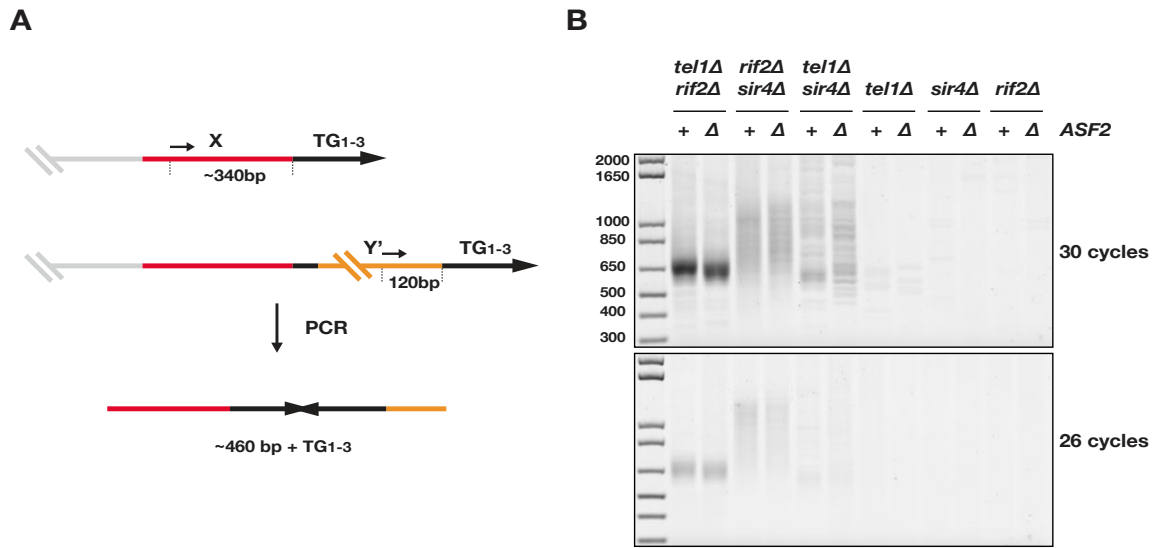

**Supplementary Figure S3:**

**Asf2 is not required for NHEJ inhibition at telomeres in *S. cerevisiae*.** **A)** To address a defect in NHEJ inhibition at telomeres in cells lacking *Asf2*, we looked at the appearance of telomere fusions, which can to some extent be amplified by PCR. All *S. cerevisiae* chromosome ends display a conserved X subteleromic element. About half the chromosome ends contain one or several Y' subteleromic elements inserted between the X element and the telomere. We used two primers to amplify fusions between Y' and X-only telomeres. Telomere length being heterogeneous, amplified telomere fusions appear as a smeared signal. The length of the PCR products indicates the length of telomeric repeats in the fusions. **B)** Cells were grown exponentially in rich medium and allowed to reach stationary phase in 6 days. Fusions between X and Y' telomeres were amplified by PCR with 30 and 26 cycles (as described in (Lescasse et al. 2013)). Rarer fusions are amplified as discrete bands. *Asf2* loss has no impact on telomere fusion frequency in contexts where the loss of *Tel1*, *Rif2* or *Sir4* weaken telomere protection (*Tel1* loss by shortening telomeres, *Rif2* and *Sir4* loss by eliminating two parallel pathways inhibiting NHEJ (Marcand et al. 2008)). This result rules out a role for *Asf2* similar to *Sir4* in telomere protection, at least in *S. cerevisiae*.



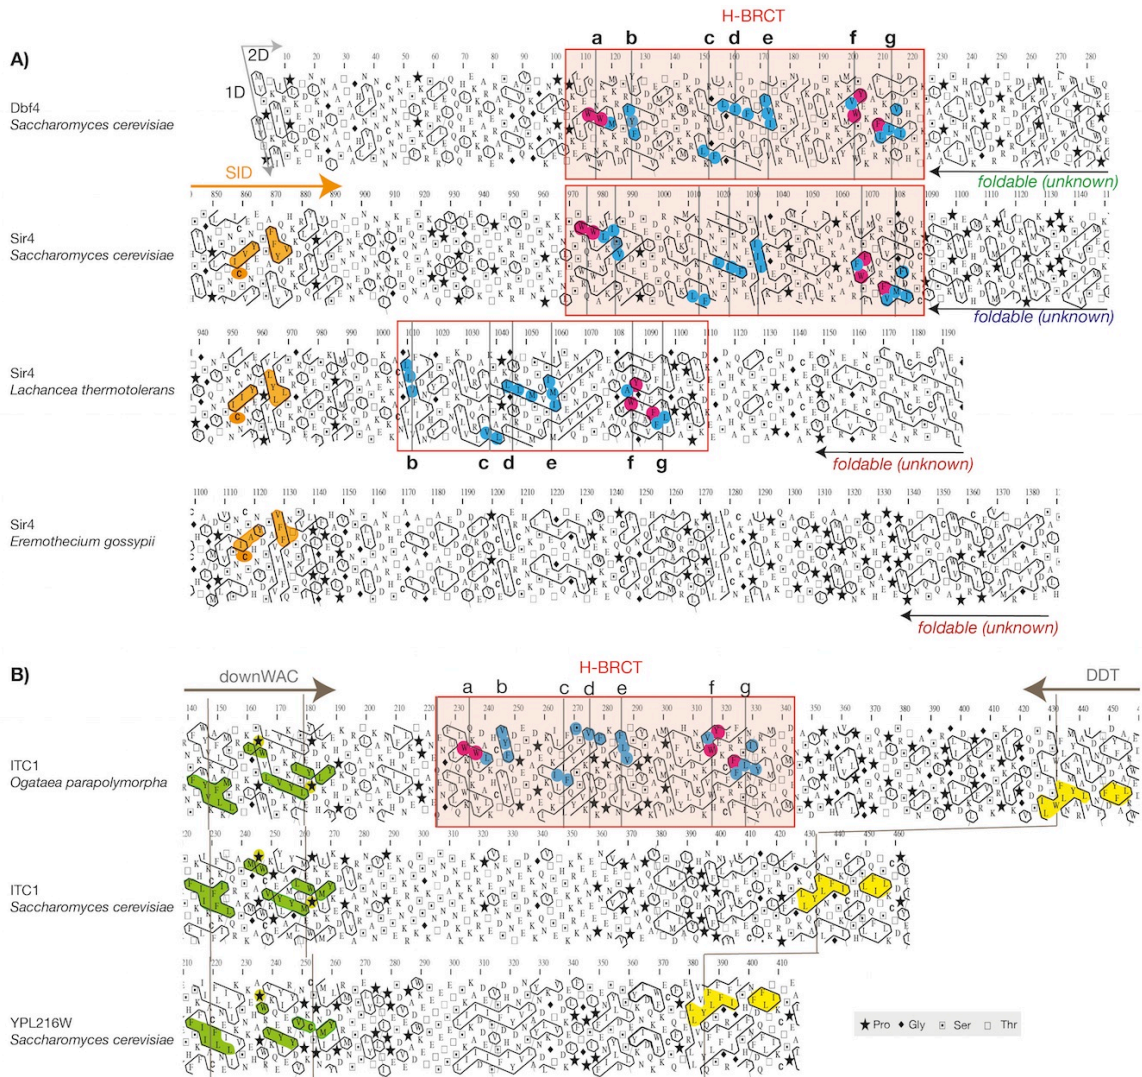

### Supplementary Figure S4:

**Presence/absence of H-BRCT domains in Dbf4, Sir4 (*Saccharomycetaceae* clade) and ITC1 (methyloph clade) sequences, as highlighting using HCA.** Principles of HCA plots are described in Supplementary Figure 1. Conserved clusters are reported in blue (H-BRCT) and in green, orange and yellow (other domains), whereas highly conserved amino acids of the H-BRCT domain are colored in pink. **A)** Sequences of the H-BRCT domains of Sir4 from *S. cerevisiae* and *L. thermotolerans* (*Saccharomycetaceae* clade), compared to the H-BRCT domain of *S. cerevisiae* Dbf4p. The *L. thermotolerans* H-BRCT domain lacks conserved motifs of canonical H-BRCT domains. The *E. gossypii* Sir4 sequence is also shown, in order to highlight the presence of a globular domain, however with no detectable similarity with the H-BRCT domain. **B)** Sequences of ITC1 from *O. parapolymorpha* (methylophs clade) compared to the two syntenic orthologs of *S. cerevisiae*, lacking the H-BRCT domain.

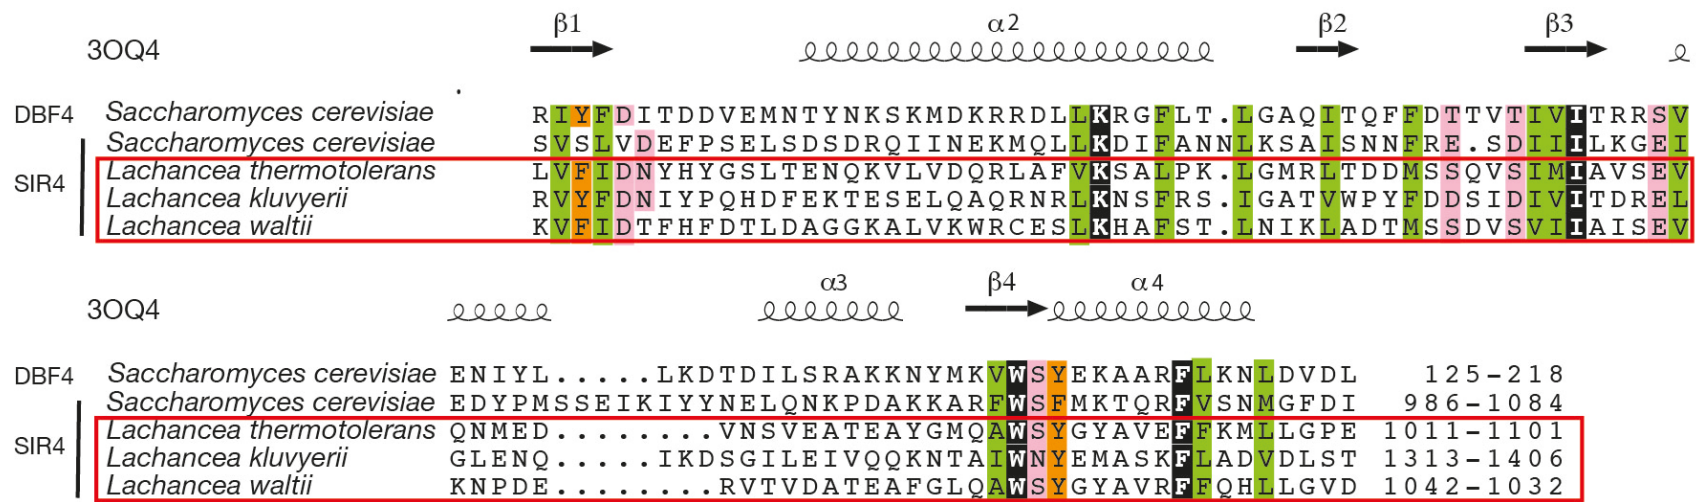

**Supplementary Figure S5:**

**Alignment of the H-BRCT sequences from *Lachancea* Sir4 proteins, compared to that of *S. cerevisiae*.**

The conserved motifs of the N-terminal  $\alpha$ -helix, including the two highly conserved tryptophane, are not found in the *Lachancea* sequences.

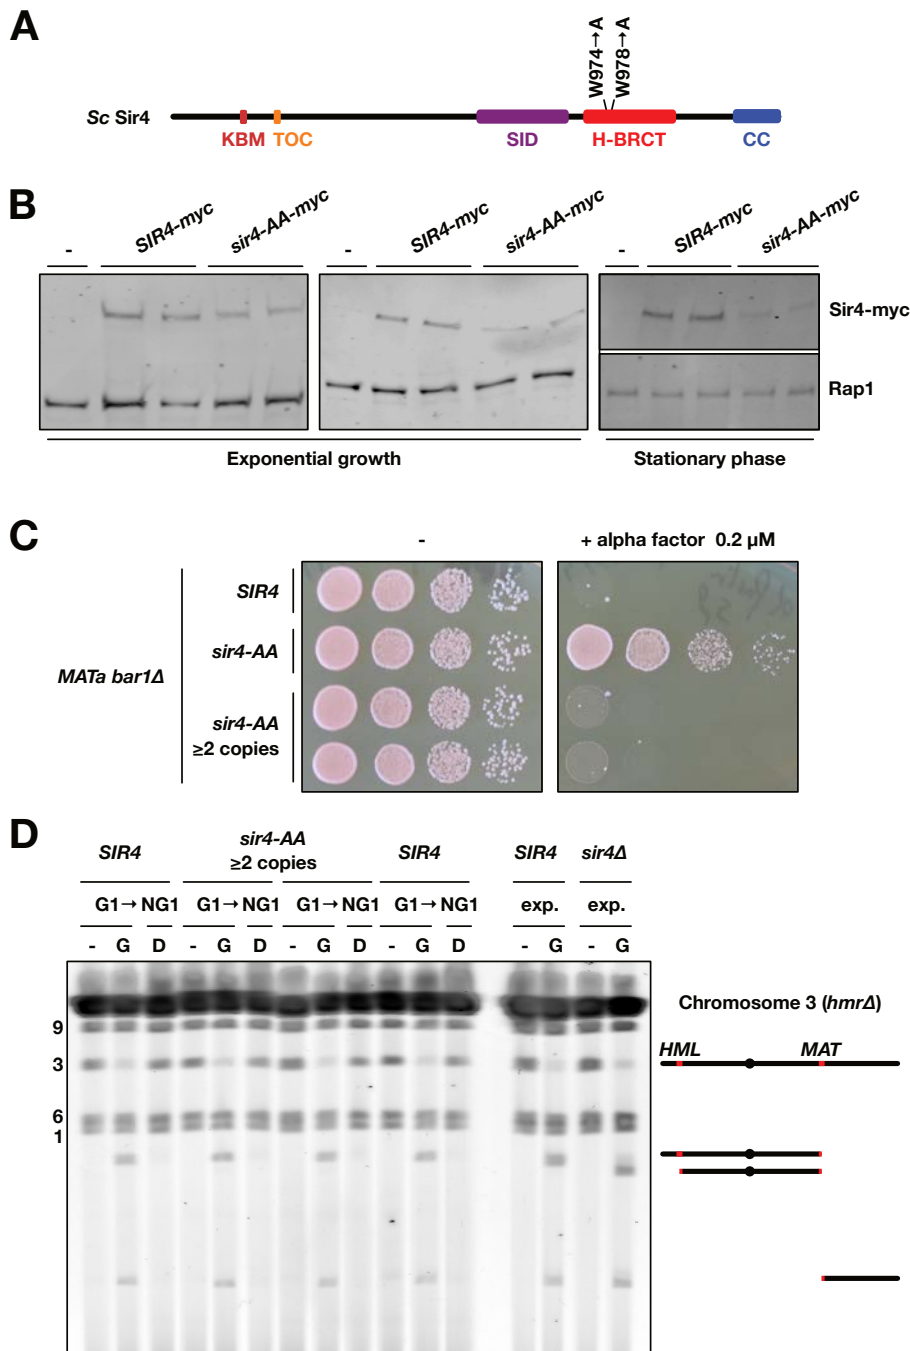

**Supplementary Figure S6:**

**Sir4 H-BRCT conserved residues W974 and W978 are not required for *HML* silencing nor for HO-induced mating type switching in *S. cerevisiae*.** **A)** Schematic representation of *S. cerevisiae* Sir4. In the *sir4-AA* allele, conserved tryptophan residues 974 and 978 are mutated into alanine. **B)** The *sir4-AA* allele integrated at the endogenous locus impacts Sir4 stability in exponential and stationary phases. Cells with an untagged WT *SIR4* (-), a myc<sup>13</sup> tagged WT *SIR4* (*SIR4-myc*) and a myc<sup>13</sup> tagged mutant *sir4-AA* (*sir4-AA-myc*) were grown exponentially in rich medium or allowed to reach stationary phase. Proteins extracted by urea were analyzed by western blot. Membranes were probed with antibodies against the myc epitope, and the Rap1



protein as a loading control. Each lane from an independent culture and extraction. **C)** The *sir4-AA* caused a silencing defect at *HML* that is suppressed by increased *sir4-AA* copy number. *MAT $\alpha$*  cells lacking the alpha-factor-specific Bar1 protease and carrying either a WT *SIR4* allele (*SIR4*), a single copy *sir4-AA* allele (*sir4-AA*) or multiple copies of the *sir4-AA* allele (*sir4-AA*  $\geq 2$  copies, tandem integration of a pRS406-*sir4-AA* plasmid within *sir4-AA* at the endogenous locus) were spotted on rich medium with or without alpha factor and grown 2 days at 30°C. 10-fold successive dilutions. Transcription of *HML* in single-copy *sir4-AA* cells allows these cells to partially escape the growth inhibition induced by alpha factor. **D)** Efficient HO-induced mating type switching in *sir4-AA* cells. *MAT $\alpha$*  cells lacking the alpha-factor specific Bar1 protease, transformed with a pRS314-pGAL1-HO plasmid and carrying either a WT *SIR4* allele (*SIR4*) or multiple copies of the *sir4-AA* allele (*sir4-AA*  $\geq 2$  copies) at the endogenous locus were grown in glycerol-lactate medium lacking tryptophan, synchronized in G1 with alpha-factor (G1 -, HO unexpressed), exposed to galactose for 40 minutes (G1 G, HO induced) and then released from G1 in glucose rich medium to be blocked again in the next G1 with alpha-factor (NG1 D, HO repressed). Chromosomes were separated by PFGE and labelled with Gel Red. Controls from unsynchronized WT and *sir4 $\Delta$*  cells transformed with the pRS314-pGAL1-HO plasmid, grown in glycerol-lactate medium lacking tryptophan (-) and exposed to galactose for 1h (G), are displayed on the right. The *HMR* cassette is deleted in the *sir4-AA* and *sir4 $\Delta$*  cells used here. HO cleavage at *MAT* (in all cells) and *HML* (in *sir4 $\Delta$*  cells only) creates fragments of chromosome 3, whose positions are indicated on the right of the figure.

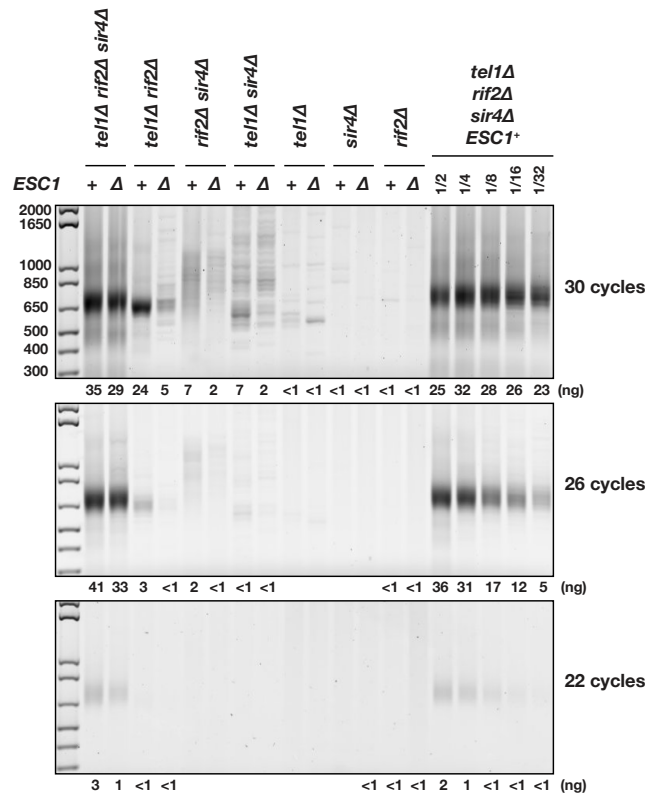

**Supplementary Figure S7:**

**Esc1 is not required for NHEJ inhibition at telomeres in *S. cerevisiae*.** Cells were grown exponentially in rich medium and allowed to reach stationary phase in 6 days. Fusions between X and Y' telomeres were amplified by PCR with 30, 26 and 22 cycles. Dilution of the template DNA provides a semi-quantitative estimation of the method's sensitivity. Esc1 loss slightly reduces telomere fusion frequency in contexts where telomere protection is weakened by Tel1, Rif2 or Sir4 losses. This result rules out a role for Esc1 similar to Sir4 in telomere protection in *S. cerevisiae*.

Esc1 *Saccharomyces cerevisiae*

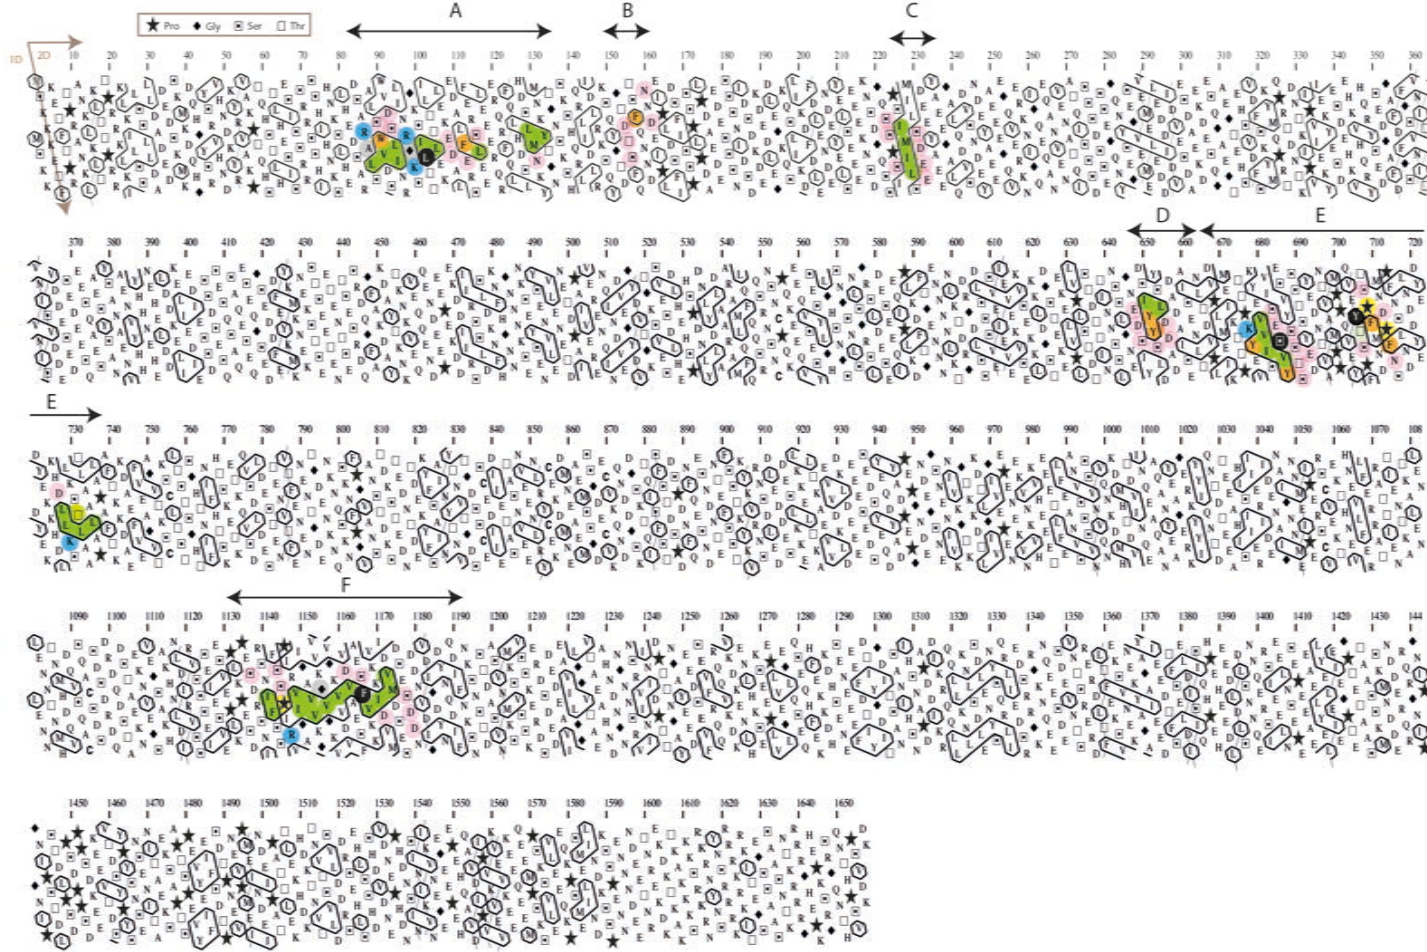



*Esc1 Tetrapispora blatae*

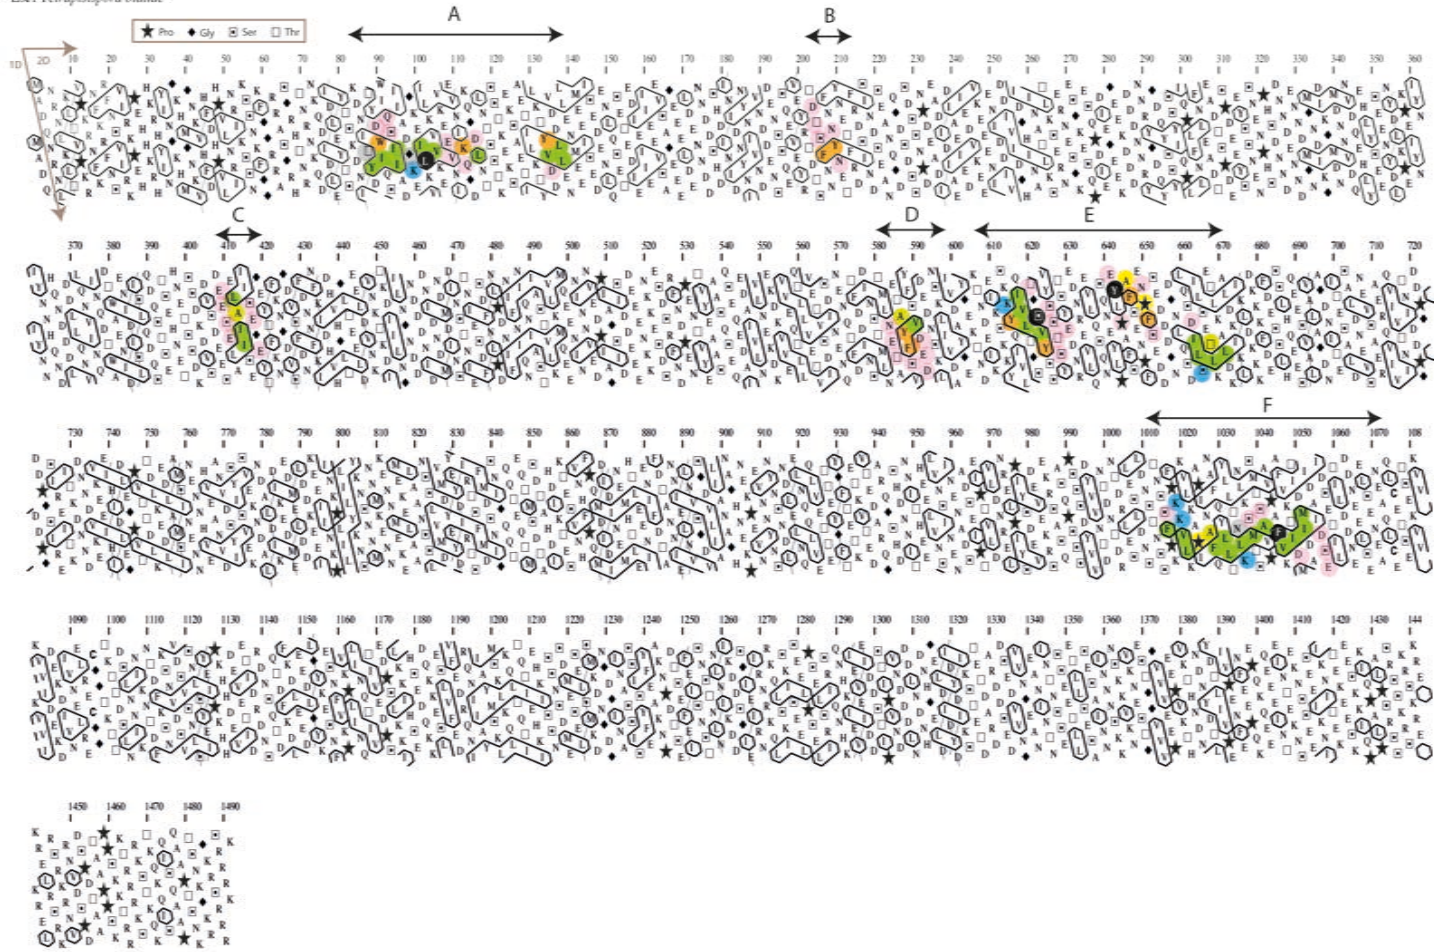



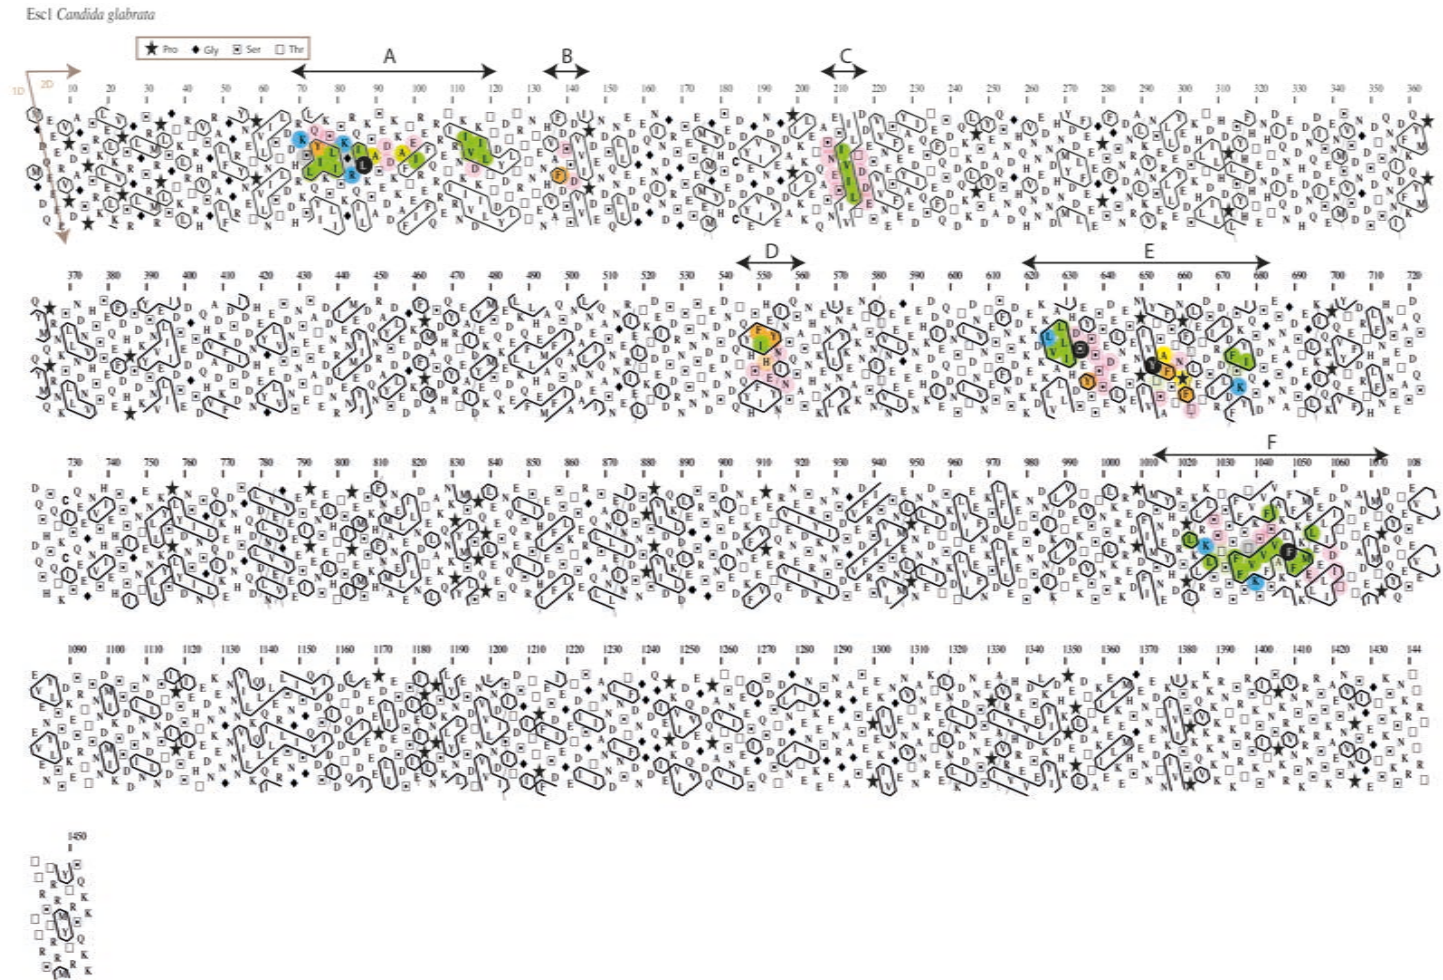

**Supplementary Figure S8 (3 pages):** HCA plots of the Esc1 proteins from *S. cerevisiae*, *T. blattae* and *C. glabrata*, illustrating how HCA can help to highlight conserved motifs around conserved hydrophobic clusters, even when they are missed by standard tools due to the high variability of intervening sequences. Here for instance, motifs Esc1-B and -F were found in the *C. glabrata* sequence through examination of its HCA plot. The same is true for motif Esc1-C in the *T. blattae* sequence. No motif Esc1-F could be found in the *Lachancea* and *Eremothecium* sequences. Color code for the conservation of amino acids: green = strong hydrophobic, orange = aromatic, pink = acidic, blue = basic, grey = tiny, yellow = loop-forming (P, G, D, N, S). Arrows indicated the six conserved regions, labelled A to F.

## Literature cited

- Callebaut I, Labesse G, Durand P, Poupon A, Canard L, Chomilier J, Henrissat B, Mornon JP. 1997. Deciphering protein sequence information through hydrophobic cluster analysis (HCA): current status and perspectives. *Cell. Mol. Life Sci.* 53:621-645.
- Dosztányi Z, Csizmók V, Tompa P, Simon I. 2005a. IUPred: web server for the prediction of intrinsically unstructured regions of proteins based on estimated energy content. *Bioinformatics* 21:3433-3434.
- Dosztányi Z, Csizmók V, Tompa P, Simon I. 2005b. The pairwise energy content estimated from amino acid composition discriminates between folded and intrinsically unstructured proteins. *J Mol Biol* 347:827-839.
- Dosztányi Z, Mészáros B, Simon I. 2009. ANCHOR: web server for predicting protein binding regions in disordered proteins. *Bioinformatics* 25:2745-2746.
- Eudes R, Le Tuan K, Delettré J, Mornon J, Callebaut I. 2007. A generalized analysis of hydrophobic and loop clusters within globular protein sequences. *BMC Struct Biol* 7:2.
- Faure G, Callebaut I. 2013. Comprehensive repertoire of foldable regions within whole genomes. *PLoS Comput Biol* 9:e1003280.
- Gaboriaud C, Bissery V, Benchetrit T, Mornon JP. 1987. Hydrophobic cluster analysis: an efficient new way to compare and analyse amino acid sequences. *FEBS Lett.* 224:149-155.
- Lescasse R, Pobiega S, Callebaut I, Marcand S. 2013. End-joining inhibition at telomeres requires the translocase and polySUMO-dependent ubiquitin ligase Uls1. *EMBO J.* 32:805-815.
- Marcand S, Pardo B, Gratias A, Cahun S, Callebaut I. 2008. Multiple pathways inhibit NHEJ at telomeres. *Genes Dev* 22:1153-1158.
- Mészáros B, Simon I, Dosztányi Z. 2009. Prediction of protein binding regions in disordered proteins. *PLoS Comput Biol* 5:e1000376.
